# Supplementary material for: NIR light-triggered peroxynitrite anion production via direct lanthanide-triplet photosensitization for enhanced photodynamic therapy
Source: Royal Society of Chemistry journal article supplement (doi:10.1039/d2tb00684g), 2022-01-01
Supplement: d2tb00684g1.pdf [file d2tb00684g1.pdf]

## Supporting Information

### **NIR light-triggered peroxyxynitrite anion production via direct lanthanide-triplet photosensitization for enhanced photodynamic therapy**

*Xi Xiao,<sup>a‡</sup> Bingzhu Zheng,<sup>a‡</sup> Qiang Zheng,<sup>b</sup> Zijie Lu,<sup>a</sup> Dong Cen,<sup>b</sup> Xiujun Cai,<sup>b</sup> Xiang Li,<sup>\*a,c</sup> and Renren Deng<sup>\*a</sup>*

#### **Supplementary Methods**

**Detection of extracellular ROS production:** DPBF was used to probe the extracellular ROS generation. In a typical process, in 2 mL solution of LnNP-Ce6-PEG or LnNP@ZnO-Ce6-PEG (175 µg/mL) was added with 50 µL acetonitrile solution containing 2.5 mM of DPBF. The mixtures were irradiated with an 808 nm laser (0.5 W/cm<sup>2</sup> or 1 W/cm<sup>2</sup>) for different periods (0-4 mins). The generation of ROS was measured by monitoring the absorbance changes in DPBF at 410 nm using a UV-Vis absorption spectrophotometer..

**Detection of extracellular NO production:** GSNO, LnNP-GSNO-PEG or LnNP@ZnO-GSNO-PEG were dispersed in PBS solution (0.16 mg/mL), followed by kept at 37 °C in the oven. An aliquot was taken out every 1 hour and centrifuged to obtain the supernatant for NO detection using Griess assay kits.

**Detection of intracellular ROS, NO and ONOO<sup>-</sup> production:** The DCFH-DA probe was used to determine ROS generation. The DAF-FM DA probe was utilized to detect NO generation. The BestBio ONOO<sup>-</sup> probe was used to detect ONOO<sup>-</sup> generation. In typical experiments, Hep 1-6 cells were incubated by 50 µg/mL of nanocomposites for three hours. After treated by NIR-light irradiation (500 mW/cm<sup>2</sup> at 808 nm for 2 min), a chemical fluorescent method was used to monitor the production of ROS, NO and ONOO<sup>-</sup> by adding the DCFH-DA, DAF-FM DA and BestBio ONOO<sup>-</sup> probes, respectively. The cells were incubated for another 20 min before they were observed by a fluorescence microscope.

**Biosafety assessment:** To verify the biosafety of the materials, the major organs (heart, liver, spleen, lung, and kidney) in each group were collected on Day 14. The samples were formalin-fixed and paraffin-embedded for permanent staining by hematoxylin and eosin. The blood samples at Day 1, Day 3 and Day 7 were also collected for blood biochemistry assay and blood routine examination at clinical laboratory of Sir Run Run Shaw Hospital.

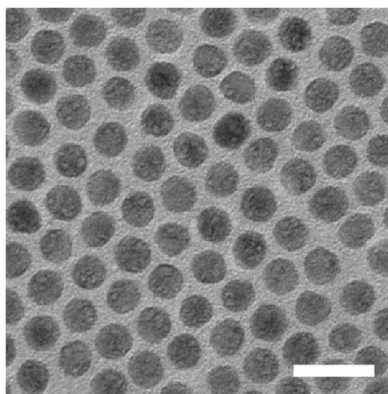

**Fig S1.** Transmission electron microscopy (TEM) images of the as-synthesized LnNP nanoparticles. The scale bar is 20 nm.

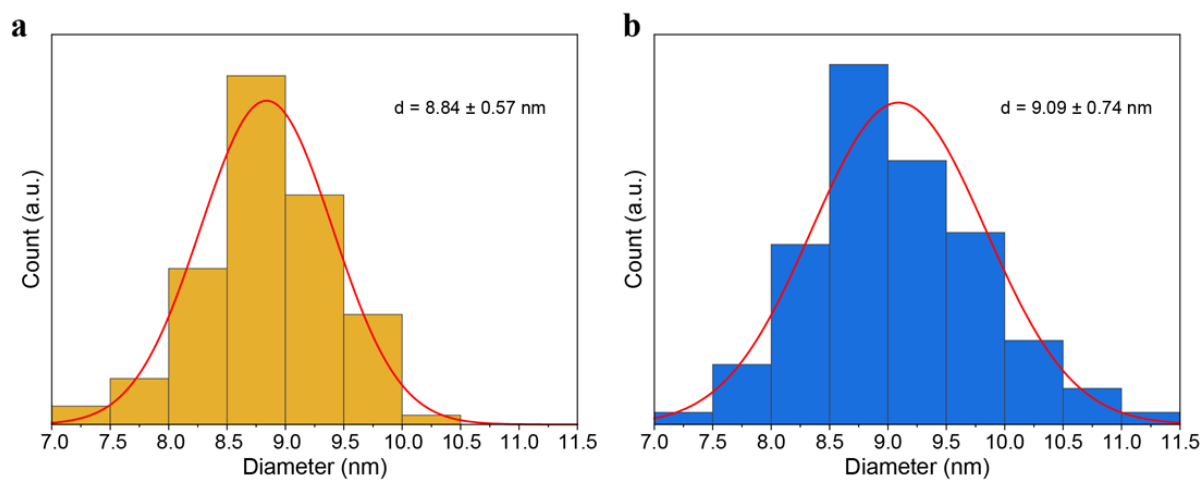

**Fig S2.** (a) Size distribution of LnNP nanoparticles. (b) Size distribution of LnNP@ZnO nanoparticles.

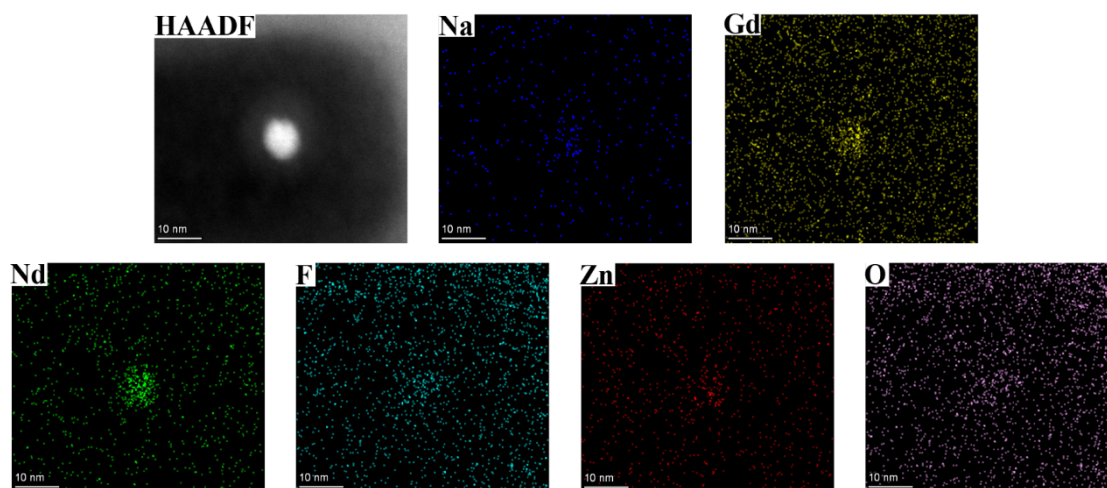

**Fig S3.** Element mapping images of a typical LnNP@ZnO particle.

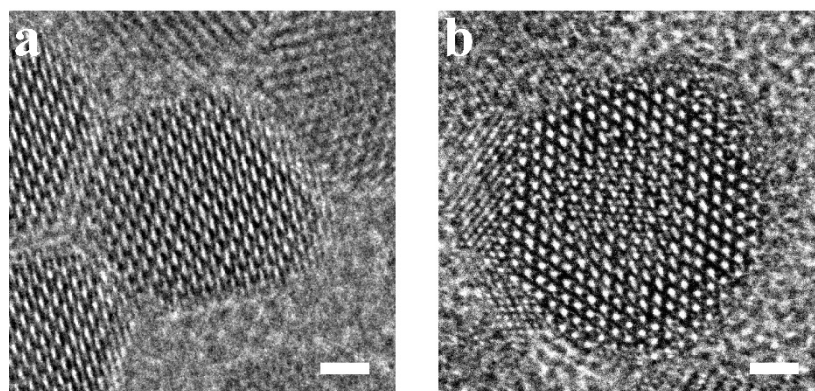

**Fig S4.** High-resolution TEM (HRTEM) images of the as-synthesized (a) LnNP nanoparticles and (b) LnNP@ZnO nanoparticles. The scale bar is 2 nm.

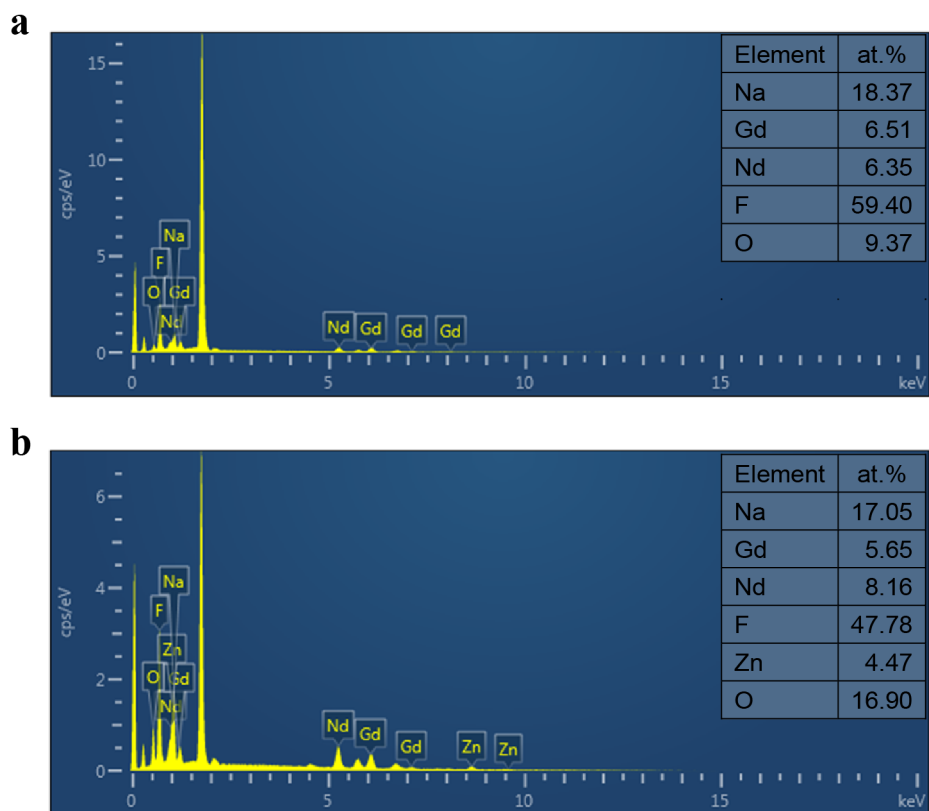

**Fig S5.** Energy dispersive spectroscopy (EDS) of **(a)** LnNP and **(b)** LnNP@ZnO powder on silicon wafer.

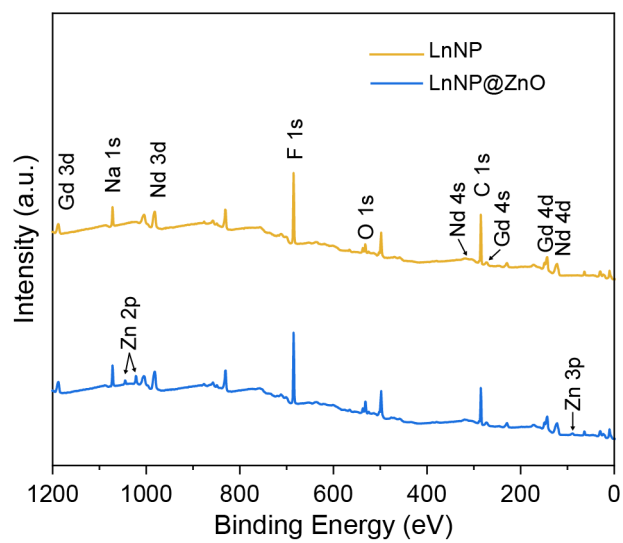

**Fig S6.** X-ray photoelectron spectroscopy (XPS) spectrum of LnNP and LnNP@ZnO powder.

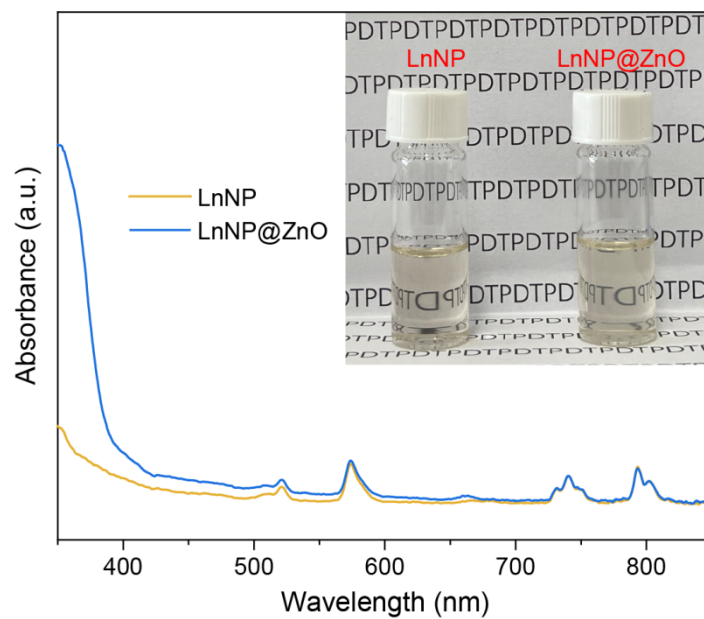

**Fig S7.** UV-vis absorption spectra of LnNP and LnNP@ZnO in cyclohexane. Inset: photo of corresponding solution.

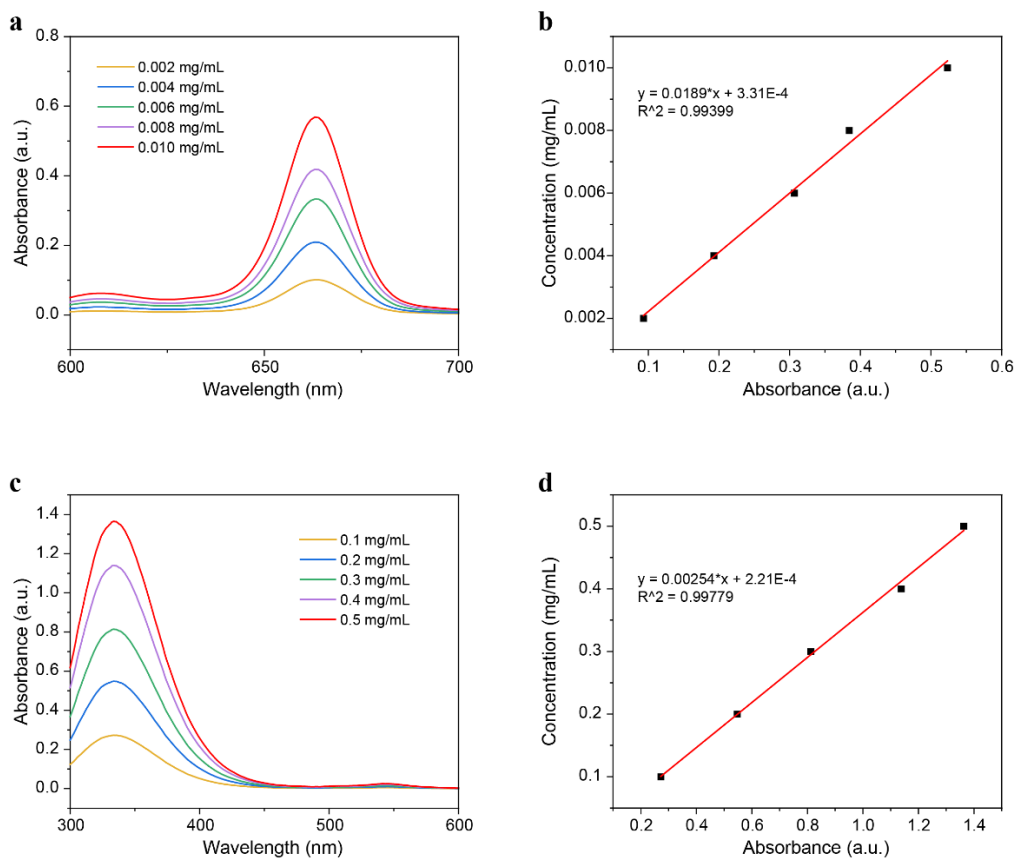

**Fig S8.** (a-b) UV-Vis spectra of Ce6 solutions at different concentrations and the plot of the Ce6 calibration dataset showing the change in absorbance of Ce6 at 660 nm as a function of concentration. (c-d) UV-Vis spectra of GSNO solutions at different concentrations and the plot of the GSNO calibration dataset showing the change in absorbance of GSNO at 334 nm as a function of concentration.

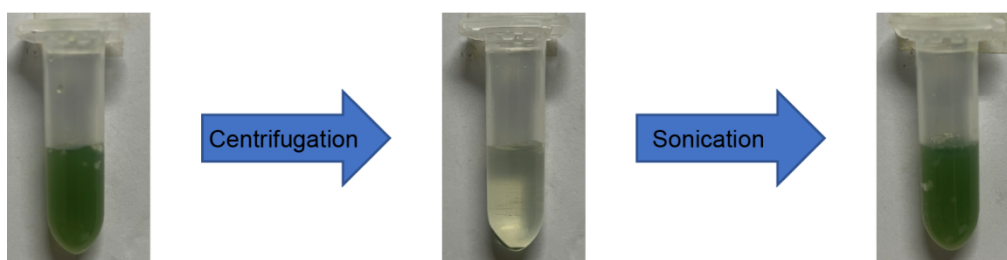

**Fig S9.** Photos of LnNP@ZnO-Ce6/GSNO-PEG nanocomposites in deionized water before and after centrifugation.



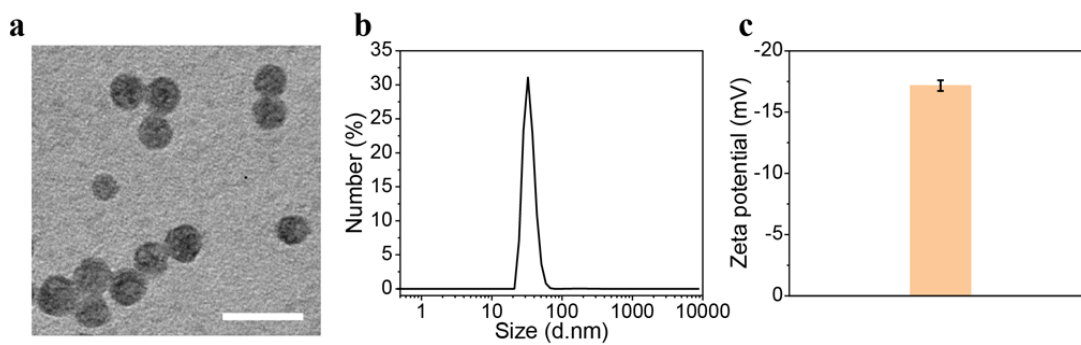

**Fig S10.** (a) TEM image of LnNP@ZnO-Ce6/GSNO-PEG. The scale bar is 20 nm. (b) Dynamic Light Scattering (DLS) measurements showing the size distribution of LnNP@ZnO-Ce6/GSNO-PEG. (c) Zeta potential of LnNP@ZnO-Ce6/GSNO-PEG.

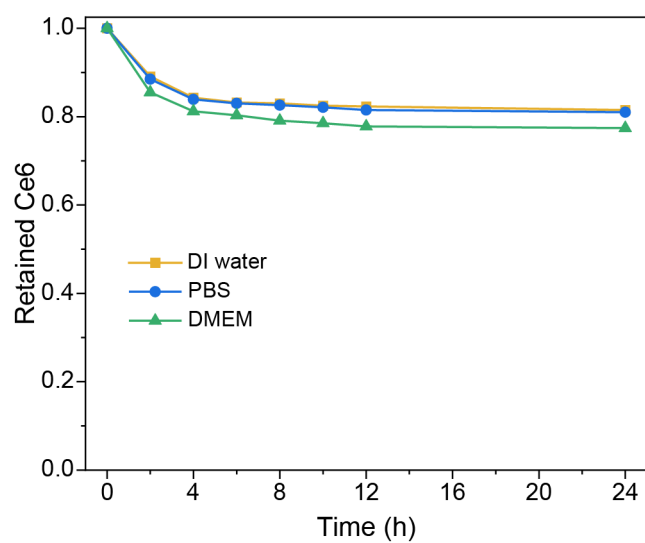

**Fig S11.** Time-dependent Ce6 release curves of LnNP@ZnO-Ce6/GSNO-PEG dispersed in DI water, PBS and Dulbecco's modified eagle medium (DMEM, containing 10% Newborn Calf Serum).

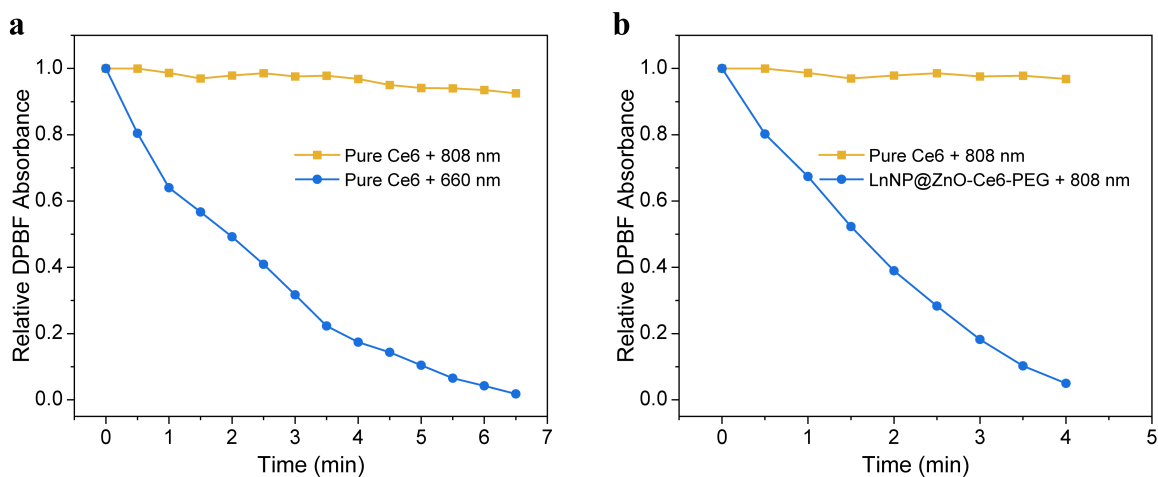

**Fig S12.** Plot of relative absorbance change of 1,3-diphenylisobenzofuran (DPBF) as a function of time, indicating the ROS generation rate of (a) pure Ce6 molecules under 808 nm/660 nm irradiation and (b) pure Ce6 molecules and LnNP@ZnO-Ce6-PEG nanocomposites under 808 nm irradiation.

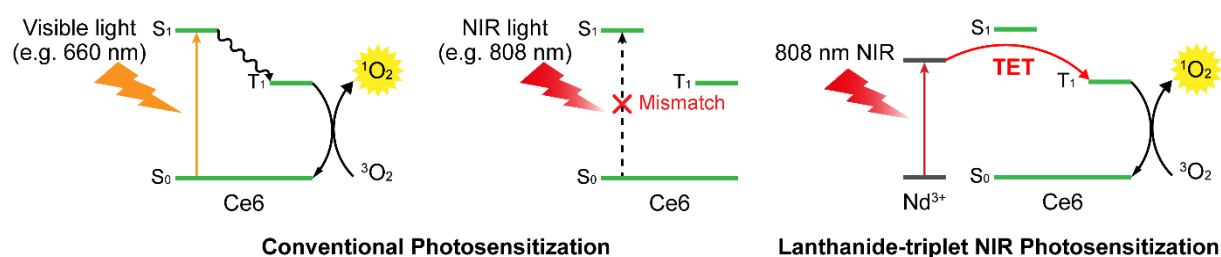

**Fig S13.** Schematic comparison of conventional photosensitization of Ce6 and direct lanthanide-triplet NIR photosensitization of  $Nd^{3+}$ -Ce6 to generate singlet oxygen.

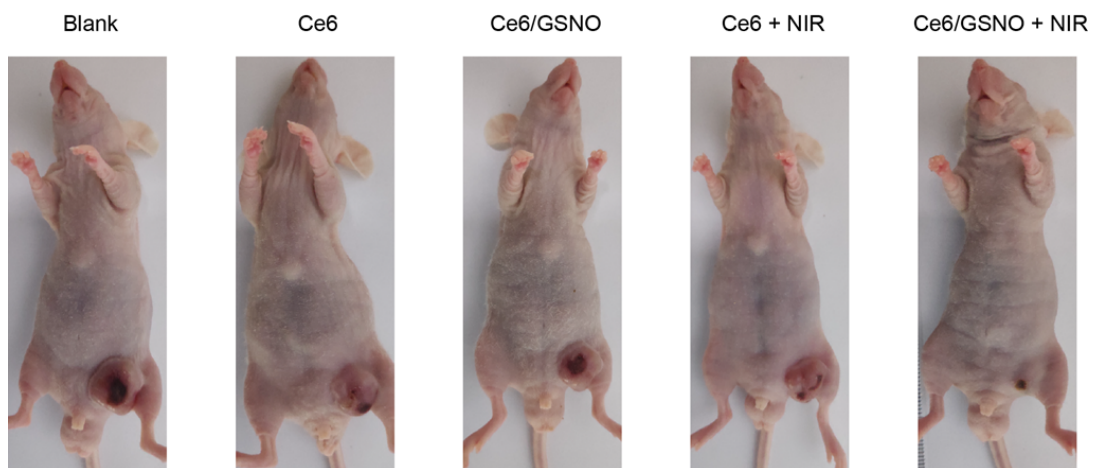

**Fig S14.** Photographs of treated mice at D14 after different treatments.

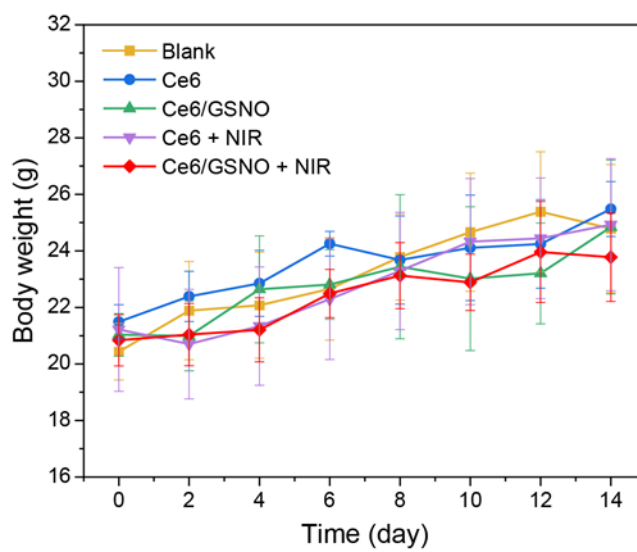

**Fig S15.** Changes in body weight of mice with Hep 1-6 liver tumor after different treatments. The error bars represent standard deviation for  $n = 5$ .

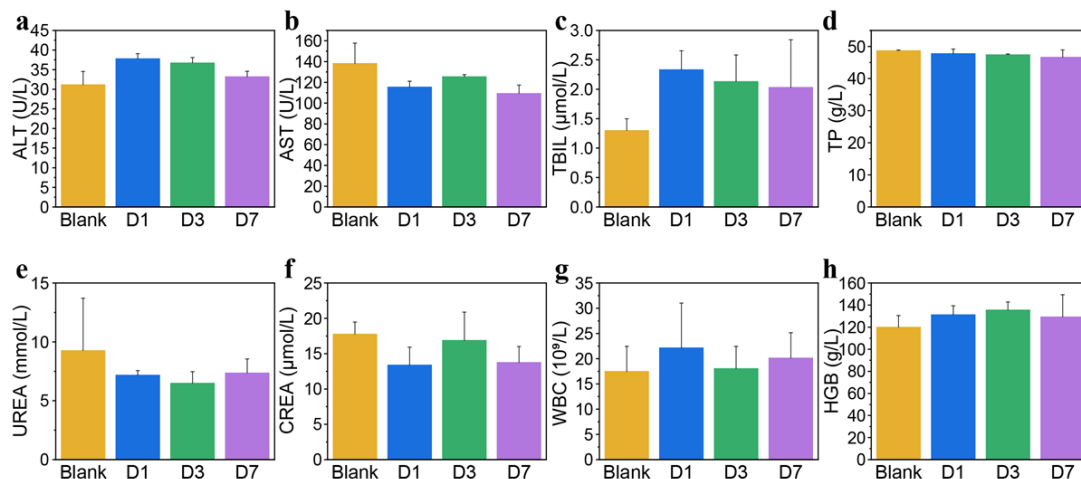

**Fig S16. (a-h)** Blood biochemistry and hematological analysis of mice after intratumorally injection of LnNP@ZnO-Ce6/GSNO-PEG, including alanine aminotransferase (ALT), aspartate aminotransferase (AST), total bilirubin (TBIL), total protein (TP), urea, creatinine (CREA), white blood cell (WBC) and hemoglobin (HGB) recorded on day 1, day 3 and day 7. The error bars represent standard deviation for n = 3.

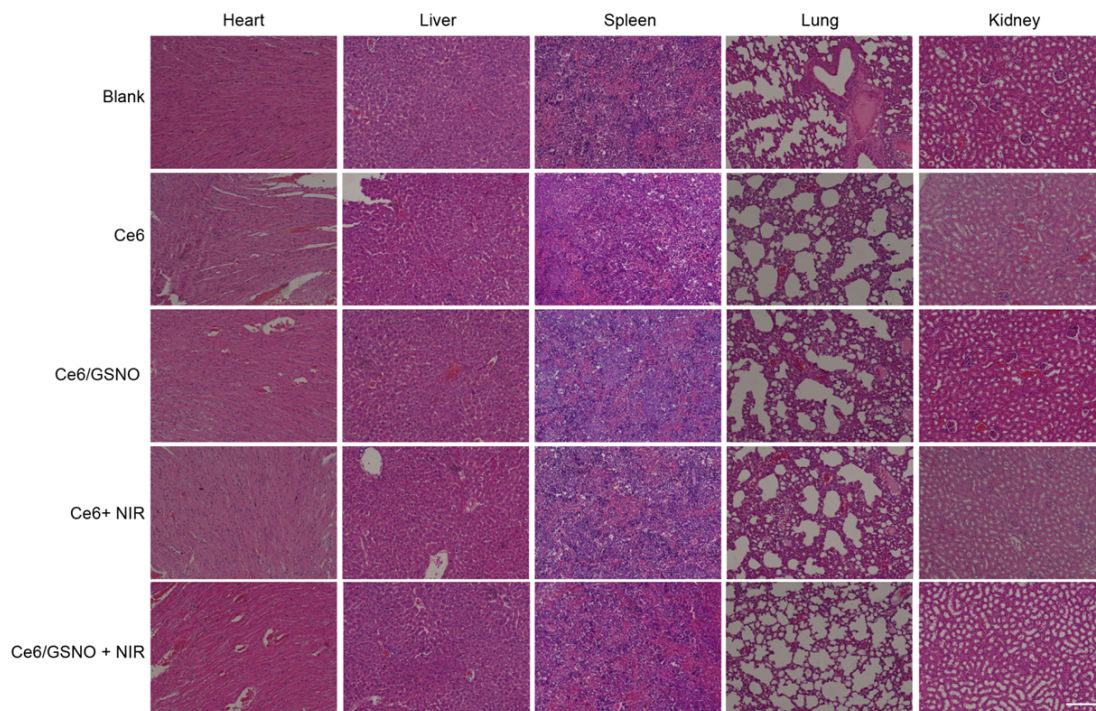

**Fig S17.** H&E staining of the major organs (heart, liver, spleen, lung and kidney) of mice to examine the pathologica changes after different treatments in 14 days. The scale bar is 200  $\mu\text{m}$ .

**Table S1** Elemental composition of LnNP and LnNP@ZnO obtained from inductively coupled plasma mass spectrometry (ICP-MS) analysis.

|          | Gd   | Nd   | Zn   |
|----------|------|------|------|
| LnNP     | 1.00 | 1.27 | /    |
| LnNP@ZnO | 1.00 | 1.34 | 0.62 |
